# Supplementary material for: Associations Between Racial and Ethnic Groups and Foot Self-Inspection in People With Diabetes
Source: Oxford University Press journal article supplement (doi:10.2337/dc19-1486), 2020-03-04
Supplement: dc191486supplementarydata.pdf [file dc191486supplementarydata.pdf]

# SUPPLEMENTARY DATA

Supplementary Table 1. Associations between racial/ethnic group and checking feet among adults with diabetes, BRFSS, 2015-2017

| Racial/ethnic group              | Weighted                               | Unadjusted                                             | 95%                    |
|----------------------------------|----------------------------------------|--------------------------------------------------------|------------------------|
|                                  | prevalence of<br>ever checking<br>feet | prevalence ratio<br>of ever vs. never<br>checking feet | Confidence<br>Interval |
| White                            | 83.2                                   | 1.00                                                   | ref                    |
| African American                 | 88.3                                   | 1.06                                                   | 1.04, 1.08             |
| American Indian/Alaska Native    | 88.0                                   | 1.06                                                   | 1.02, 1.10             |
| Asian                            | 58.3                                   | 0.70                                                   | 0.59, 0.83             |
| Native Hawaiian/Pacific Islander | 87.9                                   | 1.06                                                   | 0.97, 1.15             |
| Other                            | 72.3                                   | 0.87                                                   | 0.73, 1.04             |
| Multiracial                      | 79.3                                   | 0.95                                                   | 0.86, 1.05             |
| Hispanic                         | 74.7                                   | 0.90                                                   | 0.87, 0.93             |

All groups are non-Hispanic unless otherwise noted.
